# Supplementary material for: Safety assessment of Synechococcus sp. PCC 7002 biomass: genotoxicity, acute and subchronic toxicity studies
Source: Royal Society of Chemistry journal article supplement (doi:10.1039/d3fo01692g), 2023-01-01
Supplement: d3fo01692g1.pdf [file d3fo01692g1.pdf]

1

## Supplementary Information

2

**Safety assessment of *Synechococcus* sp. PCC 7002 biomass:**

3

**genotoxicity, acute and subchronic toxicity studies**

Shiyang Li <sup>a1</sup>, Wei Guo <sup>b1</sup>, Mingyong Zeng <sup>a</sup>, Haohao Wu <sup>a\*</sup>

*<sup>a</sup>College of Food Science and Engineering, Ocean University of China, 5 Yushan  
Road, Qingdao, Shandong Province, 266003, China*

*<sup>b</sup>School of Pharmacy, Binzhou Medical University, 346 Guanhai Road, Yantai,  
Shandong, 264003, China*

<sup>1</sup> These authors contributed equally to this work and should be considered co-first  
authors.

4

\* The author to whom correspondence should be addressed; E-mail:

5

[wuhaohao@ouc.edu.cn](mailto:wuhaohao@ouc.edu.cn); Tel. & Fax: +86-532-8203-2400.

**Table S1** Composition of *Synechococcus* sp. PCC 7002 biomass

| Pigments               | g/100g dry weight         | Amino acids                | (% of total amino acids)        |
|------------------------|---------------------------|----------------------------|---------------------------------|
| Phycocyanin            | 15.81                     | Threonine                  | 2.87                            |
| Allophycocyanin        | 4.77                      | Valine                     | 3.04                            |
| Phycoerythrin          | 1.77                      | Isoleucine                 | 2.43                            |
| Chlorophyll a          | 1.02                      | Leucine                    | 4.52                            |
| Carotenoid             | 0.92                      | Lysine                     | 2.76                            |
| <b>Minerals</b>        | <b>mg/100g dry weight</b> | Phenylalanine + Tyrosine   | 4.50                            |
| Ca                     | 1388.54                   | Methionine + Cysteine      | 0.96                            |
| Cu                     | 2.23                      | Essential Amino Acids      | 21.1                            |
| Fe                     | 25.95                     | Essential amino acid index | 39.5                            |
| K                      | 1882.29                   |                            |                                 |
| Mg                     | 825.94                    | <b>Fatty acids</b>         | <b>(% of total fatty acids)</b> |
| Na                     | 2280.21                   | Palmitic (C16:0)           | 59.04                           |
| P                      | 720.83                    | Stearic (C18:0)            | 1.29                            |
| Se (10 <sup>-3</sup> ) | 8.12                      | Arachidonic (C20:0)        | 0.61                            |
| Zn                     | 15.98                     | Total                      | 60.94                           |
| <b>Vitamins</b>        | <b>mg/100g dry weight</b> | Palmitoleic (C16:1)        | 0.85                            |
| VE                     | 12.33                     | Oleic (C18:1)              | 24.90                           |
| VK <sub>1</sub>        | 0.24                      | Eicosenoic (C20:1)         | 7.54                            |
| VB <sub>1</sub>        | 1.53                      | Total                      | 33.29                           |
| VB <sub>2</sub>        | 2.89                      | Linoleic (C18:2)           | 3.75                            |
| VB <sub>3</sub>        | 10.57                     | Eicosadienoic (C20:2)      | 1.85                            |
| VB <sub>6</sub>        | 0.78                      | Total                      | 5.60                            |

**Table S2** Revertants in the absence or presence of S9 mix in the second Ames test

|                  | TA97a      |            | TA98        |            | TA100      |            | TA102     |             | TA1535    |           |
|------------------|------------|------------|-------------|------------|------------|------------|-----------|-------------|-----------|-----------|
|                  | +S9        | -S9        | +S9         | -S9        | +S9        | -S9        | +S9       | -S9         | +S9       | -S9       |
| Control          | 115±7      | 106±7      | 32±3        | 34±4       | 99±6       | 96±5       | 302±16    | 271±18      | 19±2      | 17±2      |
| DMSO             | 106±6      | 100±12     | 36±8        | 31±4       | 109±13     | 100±4      | 296±7     | 266±15      | 18±3      | 16±4      |
| Sterile water    | 113±8      | 111±4      | 38±3        | 33±2       | 102±4      | 99±10      | 305±21    | 285±20      | 19±3      | 20±2      |
| SynB-1           | 113±8      | 110±15     | 35±2        | 32±2       | 104±8      | 102±10     | 304±26    | 288±13      | 20±3      | 17±4      |
| SynB-2           | 111±8      | 105±13     | 34±3        | 34±2       | 114±7      | 109±15     | 292±13    | 281±15      | 18±2      | 22±3      |
| SynB-3           | 136±9      | 103±7      | 32±3        | 30±4       | 116±12     | 124±11     | 301±12    | 273±7       | 20±5      | 20±2      |
| SynB-4           | 134±14     | 119±6      | 34±5        | 31±4       | 114±11     | 112±5      | 284±14    | 278±17      | 18±2      | 19±3      |
| SynB-5           | 124±5      | 105±7      | 36±3        | 33±2       | 126±6      | 123±12     | 312±3     | 264±22      | 20±2      | 16±4      |
| Dexon            |            | 1131±82*** |             | 1260±68*** |            |            |           | 1058±111*** |           |           |
| NaN <sub>3</sub> |            |            |             |            |            | 1051±81*** |           |             |           | 394±23*** |
| 2-AF             | 1245±57*** |            | 1106±109*** |            | 1267±92*** |            |           |             |           |           |
| 1,8-DHAQ         |            |            |             |            |            |            | 785±78*** |             |           |           |
| CP               |            |            |             |            |            |            |           |             | 194±22*** |           |

9 Data were expressed as means ± standard deviations (n = 8). \*\*\*Significantly different from the sterile  
10 water control group,  $P < 0.001$ . SynB-1, SynB-2, SynB-3, SynB-4 and SynB-5 denote groups treated  
11 with *Synechococcus* sp. PCC 7002 biomass at dosages of 62 µg/plate, 185 µg/plate, 556 µg/plate, 1667  
12 µg/plate and 5000 µg/plate, respectively.

14 **Table S3** Effect of acute administration of *Synechococcus* sp. PCC 7002 biomass on the organ  
 15 coefficients

|                             | CN-M      | CN-F      | SynB-M    | SynB-F    |
|-----------------------------|-----------|-----------|-----------|-----------|
| Heart (*10 <sup>-3</sup> )  | 6.09±0.98 | 6.79±0.91 | 6.19±0.49 | 5.66±1.04 |
| Liver (*10 <sup>-2</sup> )  | 5.03±0.58 | 4.73±0.17 | 4.85±0.39 | 4.79±0.44 |
| Spleen (*10 <sup>-3</sup> ) | 4.99±1.19 | 4.87±0.43 | 5.16±1.34 | 5.72±1.62 |
| Kidney (*10 <sup>-2</sup> ) | 1.58±0.12 | 1.33±0.11 | 1.59±0.12 | 1.37±0.09 |

16 Data were expressed as means ± standard deviations. Abbreviation: CN-M, male mice in the control  
 17 group; CN-F, female mice in the control group; SynB-M, male mice in the *Synechococcus* sp. PCC  
 18 7002 biomass supplementation group; SynB-F, female mice in the *Synechococcus* sp. PCC 7002  
 19 biomass supplementation group.

21 **Table S4** Effect of acute administration of *Synechococcus* sp. PCC 7002 biomass on  
 22 hematological parameters

|                       | CN-M         | CN-F        | SynB-M       | SynB-F       |
|-----------------------|--------------|-------------|--------------|--------------|
| WBC ( $10^9/L$ )      | 8.92±4.07    | 8.48±2.58   | 8.75±3.24    | 9.88±2.93    |
| LYM ( $10^9/L$ )      | 7.14±3.46    | 7.22±2.14   | 7.3±2.86     | 7.12±1.65    |
| RBC ( $10^{12}/L$ )   | 9.23±0.39    | 8.55±0.32   | 8.86±0.76    | 8.32±0.11    |
| Platelet ( $10^9/L$ ) | 613.6±119.88 | 645.2±147.1 | 626.8±182.34 | 592.5±102.31 |
| Hb (g/L)              | 149.4±8.36   | 138.6±4.11  | 136.0±13.35  | 121.3±18.54  |

23 Data were expressed as means ± standard deviations. Abbreviation: CN-M, male mice in the control  
 24 group; CN-F, female mice in the control group; SynB-M, male mice in the *Synechococcus* sp. PCC  
 25 7002 biomass supplementation group; SynB-F, female mice in the *Synechococcus* sp. PCC 7002  
 26 biomass supplementation group.

**Table S5** Urinalysis of mice in the 90-day feeding study

| □             | Dosing period (n=10) |           |           | □         | Recovery period (n=5) |   |         |
|---------------|----------------------|-----------|-----------|-----------|-----------------------|---|---------|
|               | □                    | Control   | SynB-L    |           | SynB-H                | □ | Control |
| <b>Male</b>   |                      |           |           |           |                       |   |         |
| UBG           | -                    | -         | -         | -         | -                     | - |         |
| BLD           | -                    | -         | -         | -         | -                     | - |         |
| BIL           | -                    | -         | -         | -         | -                     | - |         |
| KET           | -                    | -         | -         | -         | -                     | - |         |
| GLU           | -                    | -         | -         | -         | -                     | - |         |
| PRO           | -                    | -         | -         | -         | -                     | - |         |
| PH            | 6.0-6.5              | 6.0-7.0   | 6.0-7.0   | 6.0-6.5   | 6.0-6.5               |   |         |
| NIT           | -                    | -         | -         | -         | -                     |   |         |
| LEU           | -                    | -         | -         | -         | -                     |   |         |
| SG            | 1.03-1.06            | 1.04-1.05 | 1.04-1.05 | 1.03-1.05 | 1.03-1.05             |   |         |
| Vc            | -                    | -         | -         | □         | -                     | - |         |
| <b>Female</b> |                      |           |           |           |                       |   |         |
| UBG           | -                    | -         | -         | -         | -                     |   |         |
| BLD           | -                    | -         | -         | -         | -                     |   |         |
| BIL           | -                    | -         | -         | -         | -                     |   |         |
| KET           | -                    | -         | -         | -         | -                     |   |         |
| GLU           | -                    | -         | -         | -         | -                     |   |         |
| PRO           | -                    | -         | -         | -         | -                     |   |         |
| PH            | 6.0-7.0              | 6.0-7.0   | 6.0-7.0   | 6.0-7.0   | 6.0-7.0               |   |         |
| NIT           | -                    | -         | -         | -         | -                     |   |         |
| LEU           | -                    | -         | -         | -         | -                     |   |         |
| SG            | 1.03-1.05            | 1.04-1.05 | 1.04-1.06 | 1.04-1.06 | 1.04-1.06             |   |         |
| Vc            | -                    | -         | -         | -         | -                     |   |         |

29 “-” indicates a negative testing result. Abbreviation: SynB-L and SynB-H denote mice groups  
30 treated with *Synechococcus* sp. PCC 7002 biomass at dosages of 5 g/kg BW and 10 g/kg BW.

31

**Table S6** Hematologic parameters of mice in the 90-day feeding study

| □                            | Dosing phase (n=10) |               |               | Recovery phase (n=5) |              |
|------------------------------|---------------------|---------------|---------------|----------------------|--------------|
|                              | Control             | SynB-L        | SynB-H        | Control              | SynB-H       |
| <b>Male</b>                  |                     |               |               |                      |              |
| HGB (g/L)                    | 158.63±8.17         | 153.71±5.31   | 152.29±7.45   | 151.67±7.36          | 154.67±5.73  |
| WBC<br>(10 <sup>9</sup> /L)  | 4.65±0.79           | 5.85±0.61     | 5.71±1.36     | 4.30±0.61            | 4.26±0.64    |
| P-LCR (%)                    | 10.82±3.13          | 10.00±0.99    | 10.20±3.19    | 15.60±0.43           | 19.43±5.59   |
| RBC<br>(10 <sup>12</sup> /L) | 10.05±0.20          | 9.93±0.36     | 9.94±0.34     | 8.97±0.76            | 9.93±0.37    |
| HCT (%)                      | 51.78±1.97          | 49.83±1.98    | 50.21±2.31    | 38.63±4.42           | 53.90±1.92   |
| LY (%)                       | 62.70±4.45          | 67.50±6.36    | 70.61±4.91    | 57.57±25.95          | 51.90±14.73  |
| LY (10 <sup>9</sup> /L)      | 2.93±0.53           | 3.91±0.20     | 4.05±1.09     | 2.24±0.63            | 3.38±1.82    |
| MCHC<br>(g/L)                | 306.32±11.07        | 308.71±5.82   | 300.29±11.61  | 318.33±12.18         | 297.67±11.84 |
| MPV (fl)                     | 7.18±0.55           | 6.87±0.32     | 7.04±0.62     | 7.50±0.80            | 8.43±0.71    |
| BA (%)                       | 0.13±0.04           | 0.09±0.06     | 0.13±0.04     | 0.17±0.09            | 0.20±0.08    |
| EO (%)                       | 3.44±1.12           | 3.03±0.41     | 2.29±0.93     | 3.30±0.80            | 3.77±1.44    |
| PDW (fl)                     | 14.91±0.15          | 14.97±0.10    | 14.91±0.13    | 15.4±0.08            | 15.2±0.08    |
| PLT (10 <sup>9</sup> /L)     | 1136.2±146.56       | 984.57±116.70 | 1182.3±115.60 | 981.67±64.88         | 1093.0±58.01 |
| PCT (%)                      | 0.82±0.16           | 0.76±0.09     | 0.83±0.12     | 0.79±0.05            | 0.92±0.05    |
| <b>Female</b>                |                     |               |               |                      |              |
| HGB (g/L)                    | 162.43±5.93         | 159.00±5.72   | 155.00±6.44   | 155.00±4.55          | 161.00±2.16  |
| WBC<br>(10 <sup>9</sup> /L)  | 5.96±1.50           | 5.8±1.15      | 7.07±1.40     | 2.14±0.57            | 3.01±0.30    |
| P-LCR (%)                    | 10.91±2.11          | 12.01±2.32    | 10.39±1.96    | 31.57±10.09          | 21.47±1.49   |
| RBC<br>(10 <sup>12</sup> /L) | 10.32±0.29          | 10.15±0.24    | 10.09±0.37    | 9.10±1.01            | 9.15±1.86    |
| HCT (%)                      | 52.31±2.00          | 51.33±2.34    | 49.93±1.60    | 49.40±6.09           | 52.00±8.00   |
| LY (%)                       | 60.91±21.08         | 45.33±24.83   | 58.1±22.02    | 48.60±33.59          | 58.73±30.57  |
| LY (10 <sup>9</sup> /L)      | 3.69±1.75           | 2.43±1.41     | 4.19±1.89     | 2.06±0.84            | 2.81±1.05    |
| MCHC<br>(g/L)                | 310.43±9.31         | 310.04±5.77   | 310.14±7.67   | 314.67±4.15          | 319.33±7.76  |
| MPV (fl)                     | 7.16±0.41           | 7.33±0.36     | 7.01±0.36     | 9.57±1.34            | 8.53±0.33    |
| BA (%)                       | 0.10±0.01           | 0.12±0.03     | 0.07±0.04     | 0.17±0.05            | 0.10±0.05    |
| EO (%)                       | 3.74±1.95           | 3.44±2.10     | 3.34±0.86     | 3.33±0.12            | 3.07±0.29    |
| PDW (fl)                     | 15.07±0.13          | 15.07±0.12    | 15.04±0.10    | 15.73±0.96           | 15.30±0.08   |
| PLT (10 <sup>9</sup> /L)     | 1097.7±223.37       | 1018.4±216.90 | 1199.6±157.51 | 1262.3±122.42        | 1124±318.86  |
| PCT (%)                      | 0.79±0.19           | 0.75±0.16     | 0.85±0.15     | 1.35±0.46            | 0.96±0.28    |

33 Data were expressed as means ± standard deviations. SynB-L and SynB-H denote mice groups treated  
 34 with *Synechococcus* sp. PCC 7002 biomass at dosages of 5 g/kg BW and 10 g/kg BW.

35

36

**Table S7** Organ coefficients of mice in the 90-day feeding study

|                                   | Dosing period (n=10) |           |           | Recovery period (n=5) |   |           |           |
|-----------------------------------|----------------------|-----------|-----------|-----------------------|---|-----------|-----------|
|                                   | □                    | Control   | SynB-L    | SynB-H                | □ | Control   | SynB-H    |
| <b>Male</b>                       |                      |           |           |                       |   |           |           |
| Testis (10 <sup>-3</sup> )        |                      | 6.23±1.35 | 6.75±1.23 | 7.03±0.84             |   | 6.48±0.23 | 6.64±0.05 |
| Epididymides (10 <sup>-3</sup> )  |                      | 1.20±0.25 | 1.58±0.35 | 1.3±0.14              |   | 1.54±0.14 | 1.63±0.03 |
| Liver (10 <sup>-2</sup> )         |                      | 4.1±0.29  | 3.93±0.33 | 4.06±0.22             |   | 4.05±0.4  | 4.33±0.17 |
| Kidney (10 <sup>-2</sup> )        |                      | 1.55±0.18 | 1.63±0.16 | 1.51±0.16             |   | 1.41±0.13 | 1.57±0.15 |
| Adrenal gland (10 <sup>-4</sup> ) |                      | 1.04±0.14 | 1.14±0.11 | 1.27±0.17             |   | 1.63±0.14 | 1.62±0.14 |
| Spleen (10 <sup>-3</sup> )        |                      | 2.57±0.27 | 2.64±0.21 | 2.82±0.25             |   | 2.32±0.17 | 2.17±0.23 |
| Heart (10 <sup>-3</sup> )         |                      | 4.53±0.47 | 5.01±0.44 | 4.21±0.67             |   | 4.65±0.31 | 4.74±0.39 |
| Cerebrum (10 <sup>-3</sup> )      |                      | 6.66±0.66 | 6.97±0.58 | 7.3±0.45              |   | 4.83±0.35 | 4.78±0.48 |
| Cerebellum (10 <sup>-3</sup> )    |                      | 3.17±0.32 | 3.02±0.26 | 3.49±0.40             |   | 3.18±0.21 | 3.24±0.29 |
| <b>Female</b>                     |                      |           |           |                       |   |           |           |
| Ovary (10 <sup>-3</sup> )         |                      | 0.91±0.15 | 0.88±0.11 | 1.08±0.14             |   | 0.97±0.03 | 0.96±0.03 |
| Uterus (10 <sup>-3</sup> )        |                      | 4.7±0.89  | 4.13±1.06 | 3.94±0.76             |   | 4.54±0.2  | 4.24±0.33 |
| Liver (10 <sup>-2</sup> )         |                      | 3.87±0.29 | 4.25±0.39 | 4.02±0.17             |   | 4.27±0.11 | 4.38±0.22 |
| Kidney (10 <sup>-2</sup> )        |                      | 1.08±0.13 | 1.19±0.17 | 1.17±0.17             |   | 1.26±0.12 | 1.21±0.12 |
| Adrenal gland (10 <sup>-4</sup> ) |                      | 2.36±0.43 | 2.48±0.48 | 2.73±0.28             |   | 2.43±0.23 | 2.75±0.35 |
| Spleen (10 <sup>-3</sup> )        |                      | 3.39±0.41 | 3.99±1.10 | 4.11±0.86             |   | 3.38±0.24 | 3.43±0.26 |
| Heart (10 <sup>-3</sup> )         |                      | 4.97±0.56 | 5.25±0.53 | 5.36±0.57             |   | 5.37±0.59 | 5.1±0.56  |
| Cerebrum (10 <sup>-3</sup> )      |                      | 8.24±0.74 | 8.66±0.62 | 8.97±0.51             |   | 8.64±0.33 | 8.43±0.56 |
| Cerebellum (10 <sup>-3</sup> )    |                      | 3.65±0.22 | 3.75±0.30 | 3.52±0.40             |   | 3.83±0.36 | 3.91±0.29 |

38 Data were expressed as means ± standard deviations. SynB-L and SynB-H denote mice groups treated  
 39 with *Synechococcus* sp. PCC 7002 biomass at dosages of 5 g/kg BW and 10 g/kg BW.



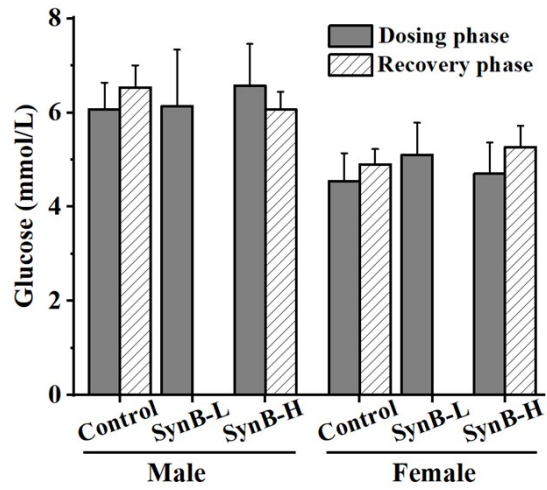

41

42 **Figure S1.** The blood glucose levels of ICR mice in the 90-day feeding study. Data were  
 43 expressed as means  $\pm$  standard deviations. SynB-L and SynB-H denote mice groups treated with  
 44 *Synechococcus* sp. PCC 7002 biomass at dosages of 5 g/kg BW and 10 g/kg BW.
